# Supplementary material for: Quantitative detection of severe fever with thrombocytopenia syndrome virus via electrochemiluminescence immunoassay
Source: Royal Society of Chemistry journal article supplement (doi:10.1039/c9ay01278h), 2019-01-01
Supplement: c9ay01278h1.pdf [file c9ay01278h1.pdf]

## Supporting Information

### Quantitative detection of severe fever with thrombocytopenia syndrome virus via electrochemiluminescence immunoassay

Xiu-Li Liang,<sup>a</sup> Jin-Xia Liu,<sup>a</sup> Yong-Jun Jiao,<sup>b</sup> Jin Zhu<sup>c</sup> and Shou-Nian Ding<sup>\*a</sup>

<sup>a</sup> Jiangsu Province Hi-Tech Key Laboratory for Bio-medical Research, School of Chemistry and Chemical Engineering, Southeast University, Nanjing 211189, China

<sup>b</sup> Jiangsu Provincial Center for Disease Control and Prevention, Nanjing 210009, China

<sup>c</sup> Huadong Medical Institute of Biotechniques, Nanjing 210002, China

\*Corresponding authors. (S.-N. Ding) Fax: (+86) 25-52090621.

E-mail: [snding@seu.edu.cn](mailto:snding@seu.edu.cn).

## Contents

| <b>Experimental part</b>                                                            | <b>Page</b> |
|-------------------------------------------------------------------------------------|-------------|
| Reagents and chemicals                                                              | 3           |
| Apparatus and measurements                                                          | 3           |
| <b>Results and discussion</b>                                                       |             |
| Figure S1. UV and FL spectra of CdZnTeS QDs                                         | 4           |
| Figure S2. FTIR spectra of Fe <sub>3</sub> O <sub>4</sub> @SiO <sub>2</sub>         | 4           |
| Figure S3. The optimization of experimental condition                               | 4           |
| Figure S4. The continuous cyclic potential scanning of 100 fg/mL SFTSV immunosensor | 5           |
| Table S1. Comparison of test results between this work and other methods            | 5           |
| Table S2. Recovery tests of SFTSV spiked in the human serum                         | 5           |
| <b>Reference</b>                                                                    | 6           |

## Reagents and chemicals

Cadmium Chloride ( $\text{CdCl}_2 \cdot 2.5 \text{ H}_2\text{O}$ ) was bought from Shanghai Jinshan Tingxin Chemical Reagent Co. Ltd.  $\text{NaBH}_4$ , tellurium powder (Te), ethylene glycol (EG),  $\text{FeCl}_3 \cdot 6 \text{ H}_2\text{O}$ , trisodium citrate dehydrate ( $\text{Na}_3\text{Cit} \cdot 2 \text{ H}_2\text{O}$ ) and sodium acetate anhydrous (NaAc) were obtained from Sinopharm Chemical Reagents Co. Ltd. Glutaraldehyde (GA), L-cysteine, (3-aminopropyl) triethoxysilane (APTES) and tetraethyl orthosilicate (TEOS) were provided by Aladdin Industrial Corporation. EDC was supplied by Sigma-Aldrich. BSA was obtained from Sangon Biotech Co., Ltd.  $\text{ZnCl}_2$  was provided by West Long Chemical Co. Ltd. FITC-labeled  $\text{Ab}_1$  was purchased from Linc-Bio Science Co., Ltd. Distilled water was used throughout the experiment.

## Apparatus and measurements

TEM was carried out on JEM-2100 electron microscope (JEOL Ltd). FL was performed on FluoroMax-4 fluorescence spectrophotometer (Horiba, USA). UV-Vis absorption spectra were obtained from Shimadzu UV-2450 Spectrophotometer (Tokyo, Japan). The FTIR spectrum was recorded on Nicolet 5700 (USA) IR spectrometer. The confocal fluorescence image was photographed on Laser Scanning Confocal Microscope (LSM700). Electrochemical impedance spectroscopy (EIS) was measured on the Gamry Reference 600 electrochemical workstation.

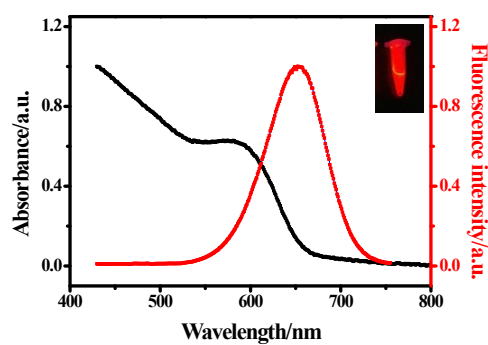

**Figure S1** Ultraviolet-visible absorption spectrum and fluorescence emission spectrum of CdZnTeS QDs.

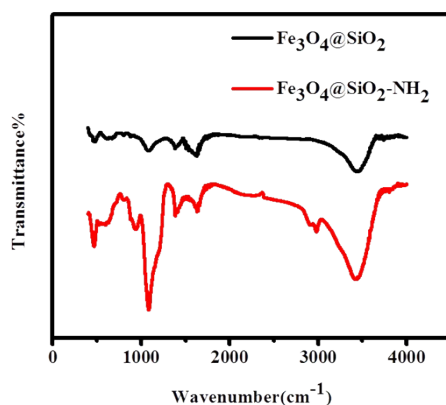

**Figure S2** FTIR spectra of the synthetic  $\text{Fe}_3\text{O}_4@\text{SiO}_2$  and  $\text{Fe}_3\text{O}_4@\text{SiO}_2\text{-NH}_2$ .

Two new bands at 2923 and 2858  $\text{cm}^{-1}$  appeared after treated by APTES, which were attributed to the C-H stretching vibration of propyl group. Moreover, the broad band located at 3441  $\text{cm}^{-1}$  was ascribed to N-H stretching vibration. FTIR spectra indicated that the surface of  $\text{Fe}_3\text{O}_4@\text{SiO}_2$  was aminated successfully.

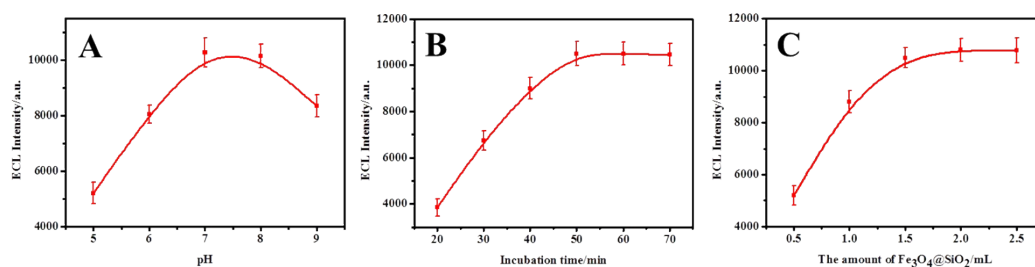

**Figure S3** The optimization of (A) pH, (B) incubation time and (C) the amount of  $\text{Fe}_3\text{O}_4@\text{SiO}_2$ .

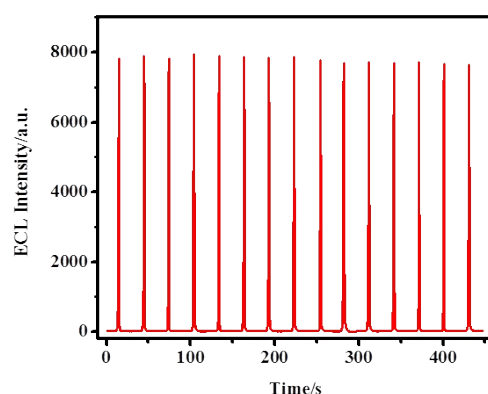

**Figure S4** The continuous cyclic potential scanning of 100 fg/mL SFTSV immunosensor.

**Table S1** Comparison of test results between this work and other methods.

| Number | Materials, Methods                                                        | Detection limit    | Reference |
|--------|---------------------------------------------------------------------------|--------------------|-----------|
| 1      | Minor-groove-binding probe, RT-PCR method                                 | 10 copies/ $\mu$ L | 1         |
| 2      | TaqMan probes, RT-PCR method                                              | 10 copies/ $\mu$ L | 2         |
| 3      | Colloidal gold, Paper-based lateral flow immunochromatography test strips | 1 ng/mL            | 3         |
| 4      | CdZnTeS QDs, Electrochemiluminescence                                     | 0.003 fg/mL        | This work |

**Table S2** Recovery tests of SFTSV spiked in the human serum by the fabricated immunosensor.

| SFTSV concentration in the serum (pg/mL) | Added SFTSV concentration (pg/mL) | Measured concentration (pg/mL)         | Average value (pg/mL) | RSD (%) | Recovery (%) |
|------------------------------------------|-----------------------------------|----------------------------------------|-----------------------|---------|--------------|
| 50                                       | 40                                | 93.3, 88.7, 93.5, 94.8, 91.2           | 92.3                  | 2.59    | 102.56       |
|                                          | 50                                | 96.6, 104.7, 103.4, 106.3, 99.2        | 102.04                | 3.94    | 102.04       |
|                                          | 60                                | 106.5, 107.3, 111.8, 114.6, 113.5      | 110.74                | 3.30    | 100.67       |
| 500                                      | 400                               | 918.2, 907.7, 893.5, 883.9, 894.3      | 899.52                | 1.50    | 99.95        |
|                                          | 500                               | 988.1, 982.6, 996.4, 1009.3, 991.1     | 993.5                 | 1.02    | 99.35        |
|                                          | 600                               | 1076.6, 1053.2, 1107.9, 1103.8, 1118.1 | 1091.92               | 2.43    | 99.27        |

## Reference

1. Z. Li, L. Cui, M. Zhou, X. Qi, C. Bao, J. Hu, J. Shan, B. Wu, S. Wang, X. Guo, Y. Jiao, F. Tang and H. Wang, *J. Med. Virol.*, 2013, **85**, 370-377.
2. Z. Li, X. Qi, M. Zhou, C. Bao, J. Hu, B. Wu, S. Wang, Z. Tan, J. Fu, J. Shan, Y. Zhu and F. Tang, *Arch. Virol.*, 2013, **158**, 1857-1863.
3. J.-Y. Zuo, Y.-J. Jiao, J. Zhu and S.-N. Ding, *ACS Omega*, 2018, **3**, 15399-15406.
